# Supplementary material for: Link between carrot leaf secondary metabolites and resistance to Alternaria dauci
Source: PubMed Central journal article supplement (PMC6137067; doi:10.1038/s41598-018-31700-2), 2018-09-13
Supplement: 41598_2018_31700_MOESM1_ESM.pdf [file 41598_2018_31700_MOESM1_ESM.pdf]

## **Link between carrot leaf secondary metabolites and resistance to *Alternaria dauci***

Claude Koutouan, Valérie Le Clerc\*, Raymonde Baltenweck\*, Patricia Claudel, David Halter, Philippe Hugueney, Latifa Hamama, Anita Suel, Sébastien Huet, Marie-Hélène Bouvet Merlet & Mathilde Briard

[\\*valerie.leclerc@agrocampus-ouest.fr](mailto:valerie.leclerc@agrocampus-ouest.fr)

[\\*raymonde.baltenweck@inra.fr](mailto:raymonde.baltenweck@inra.fr)

**Supplementary information**

**Supplementary Table S1** Evaluation of resistance to *Alternaria dauci*

| Parental lines and cultivars | Mean disease index * of a 10 year evaluation | F3 segregating progenies | Mean disease index * of a 3 year evaluation |
|------------------------------|----------------------------------------------|--------------------------|---------------------------------------------|
| H1                           | 7                                            | PC3-265                  | 3.8                                         |
| Boléro                       | 4.3                                          | PC3-241                  | 4                                           |
| I2                           | 3.8                                          | PC3-109                  | 4.2                                         |
| K3                           | 3.4                                          | PC3-196                  | 4.3                                         |
|                              |                                              | PC3-222                  | 4.3                                         |
|                              |                                              | PC3-176                  | 4.5                                         |
|                              |                                              | PC3-226                  | 4.5                                         |
|                              |                                              | PC3-249                  | 4.5                                         |
|                              |                                              | PC3-263                  | 4.5                                         |
|                              |                                              | PC3-40                   | 4.6                                         |
|                              |                                              | PC3-105                  | 6.3                                         |
|                              |                                              | PC3-135                  | 6.3                                         |
|                              |                                              | PC3-154                  | 6.3                                         |
|                              |                                              | PC3-4                    | 6.3                                         |
|                              |                                              | PC3-78                   | 6.5                                         |
|                              |                                              | PC3-106                  | 6.7                                         |
|                              |                                              | PC3-83                   | 6.7                                         |
|                              |                                              | PC3-240                  | 6.8                                         |
|                              |                                              | PC3-262                  | 6.8                                         |
|                              |                                              | PC3-12                   | 6.9                                         |

\* Disease index obtained as described by Le Clerc *et al.* (2009) based on a 0 to 9 scale (0 = no visible disease damage on leaves, 9 = leaves totally blighted)

PC3 is a segregating population obtained from a cross between H1 and K3 genotypes

**a**

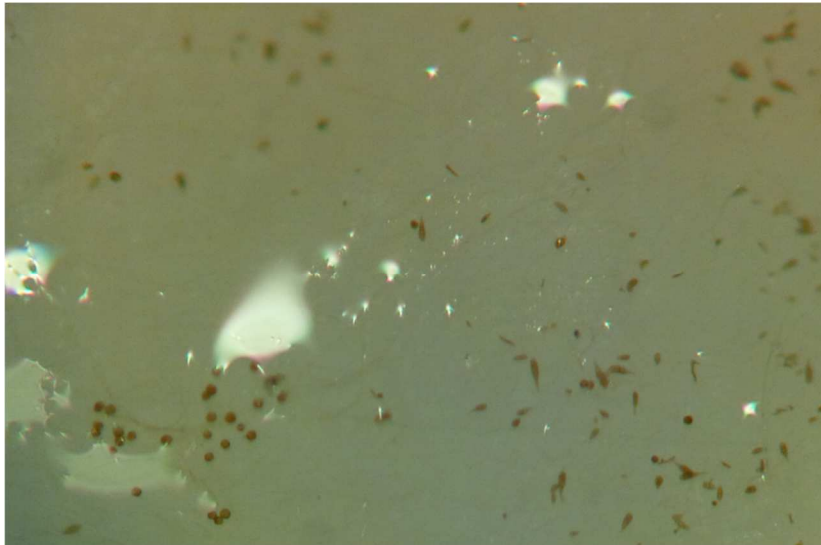

**b**

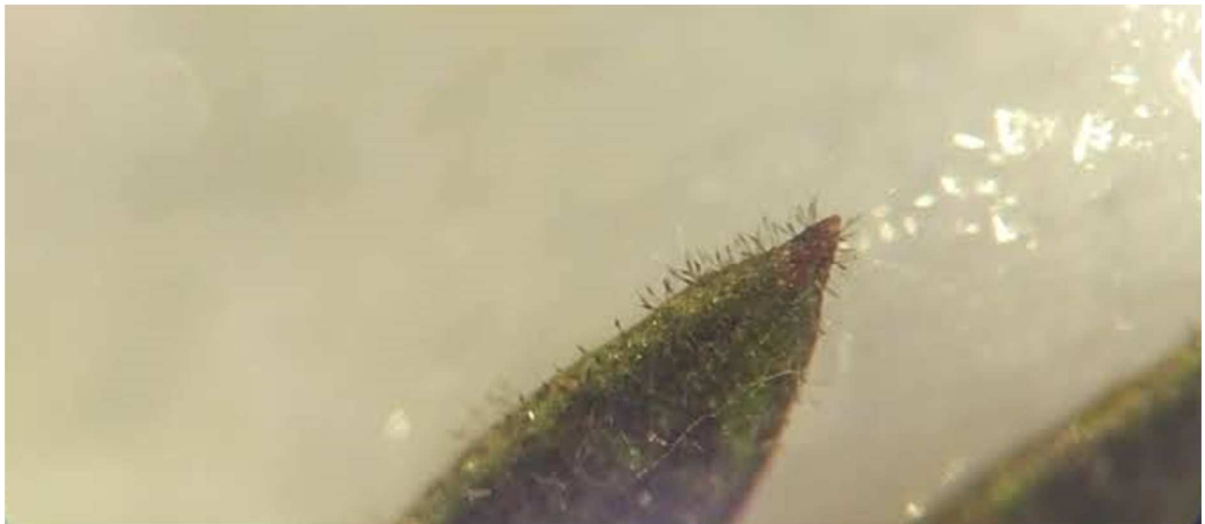

**Supplementary Figure S1** Isolation of *Alernaria dauci* from carrot leaves in Blagon and Ychoux Field after attack prediction. (a) Blagon 2015: Observation of conidies on binocular loup NIKON SMZ 1000 plan Apo - 1X - WD70 / Agrandissement 6X. (b) Ychoux 2016: Observation of conidies on binocular loup NIKON SMZ 1000 plan Apo - 1X - WD70 / Agrandissement 4X

**Supplementary Table S2** Secondary metabolites highlighted by profiling. Full name and subfamily of known metabolites are given

| Ion n° ( LCMS) | Full name                                  | Sub-Family       |
|----------------|--------------------------------------------|------------------|
| 5              | Chlorogenic_acid                           | chlorogenic acid |
| 10             | Feruloylquinic_acid                        | chlorogenic acid |
| 11             | Luteolin 7- <i>O</i> -rutinoside           | Flavone          |
| 15             | Luteolin 7- <i>O</i> -glucoside            | Flavone          |
| 21             | Apigenin 7- <i>O</i> -rutinoside           | Flavone          |
| 25             | Luteolin 7- <i>O</i> -glucuronide          | Flavone          |
| 27             | chrysoeriol 7- <i>O</i> -rutinoside        | Flavone          |
| 35             | Apigenin 7- <i>O</i> -glucoside            | Flavone          |
| 36             | Luteolin 4'- <i>O</i> -glucoside           | Flavone          |
| 39             | Apigenin 4'- <i>O</i> -glucoside           | Flavone          |
| 42             | Chrysoeriol 7- <i>O</i> -glucoside         | Flavone          |
| 44             | Chrysoeriol 7- <i>O</i> -glucuronide       | Flavone          |
| 45             | M611T367                                   | unknown          |
| 47             | Apigenin 7- <i>O</i> -malonyl-glucoside    | Flavone          |
| 48             | Luteolin 7- <i>O</i> -malonyl-glucoside    | Flavone          |
| 50             | Chrysoeriol 7- <i>O</i> -malonyl-glucoside | Flavone          |

| Code  | Full name                    | Sub-Family    |
|-------|------------------------------|---------------|
| aAmo  | $\alpha$ -Amorphene          | Sesquiterpene |
| aBis  | $\alpha$ -Bisabolene         | Sesquiterpene |
| aCop  | $\alpha$ -Copaene            | Sesquiterpene |
| aHum  | $\alpha$ -Humulene           | Sesquiterpene |
| aPi   | $\alpha$ -Pinene             | Monoterpene   |
| aTer  | $\alpha$ -Terpinolene        | Monoterpene   |
| Bac   | Bornyl acetate               | Monoterpene   |
| bBis  | $\beta$ -Bisabolene          | Sesquiterpene |
| bCub  | $\beta$ -Cubebene            | Sesquiterpene |
| bMyr  | $\beta$ -Myrcene             | Monoterpene   |
| bPhe  | $\beta$ -Phellandrene        | Monoterpene   |
| bPi   | $\beta$ -Pinene              | Monoterpene   |
| bSel  | $\beta$ -Selinene            | Sesquiterpene |
| caBer | cis- $\alpha$ -Bergamotene   | Sesquiterpene |
| Camp  | Camphene                     | Monoterpene   |
| Cary  | Caryophyllene                | Sesquiterpene |
| cbFar | cis- $\beta$ -Farnesene      | Sesquiterpene |
| cRo   | cis-Rose oxide               | Monoterpene   |
| dCad  | $\delta$ -Cadinene           | Sesquiterpene |
| EaFar | cis- $\alpha$ -Farnesene     | Sesquiterpene |
| EbOc  | cis- $\beta$ -Ocimene        | Monoterpene   |
| GerD  | Germacrene D                 | Sesquiterpene |
| gTer  | $\gamma$ -Terpinene          | Monoterpene   |
| Lim   | Limonene                     | Monoterpene   |
| Lin   | Linalol                      | Monoterpene   |
| pCy   | p-Cymene                     | Monoterpene   |
| Sab   | Sabinene                     | Monoterpene   |
| taBer | trans- $\alpha$ -Bergamotene | Sesquiterpene |
| tbFar | trans- $\beta$ -Farnesene    | Sesquiterpene |
| ZbOc  | trans- $\beta$ -Ocimene      | Monoterpene   |

**Supplementary Table S3** Integrated peak of selected metabolites in four genotypes of carrot over three years

|                                   | 2014-H1   | 2014-Boléro | 2014-I2  | 2014-K3   | 2015-H1  | 2015-Boléro | 2015-I2  | 2015-K3  | 2016-H1  | 2016-Boléro | 2016-I2  | 2016-K3  |
|-----------------------------------|-----------|-------------|----------|-----------|----------|-------------|----------|----------|----------|-------------|----------|----------|
| chlorogenic acid                  | 99670337  | 98874432    | 78147831 | 117936659 | 67723644 | 23301823    | 50413172 | 66996796 | 27461093 | 31181390    | 30993571 | 48214646 |
| feruloylquinic acid               | 2155653   | 2988953     | 2352024  | 5742113   | 673365   | 642683      | 707434   | 1815203  | 367806   | 644346      | 549541   | 1350678  |
| luteolin 7-O-rutinoside           | 5712791   | 13909266    | 14576633 | 3326505   | 1071346  | 17049779    | 13735467 | 1631092  | 838863   | 7449632     | 12479541 | 790380   |
| luteolin 7-O-glucoside            | 145247684 | 61317611    | 72425104 | 61746587  | 91195646 | 71574558    | 73097571 | 73284296 | 58745238 | 41103197    | 50223857 | 33031273 |
| luteolin 7-O-glucuronide          | 33498058  | 23649734    | 8428027  | 1778686   | 50463978 | 43104983    | 40722094 | 11393821 | 33495658 | 26931513    | 27766822 | 3860882  |
| apigenin 7-O-rutinoside           | 10846273  | 17848265    | 46356772 | 17854170  | 1047318  | 8273596     | 10743815 | 7678015  | 1705583  | 3775559     | 14186326 | 5732825  |
| chrysoeriol 7-O-rutinoside        | 5333263   | 13558807    | 24334383 | 2551273   | 467793   | 14080679    | 11111681 | 1075291  | 554107   | 5477313     | 10700462 | 689063   |
| apigenin 7-O-glucoside            | 132133852 | 20629342    | 52471644 | 116426596 | 51418951 | 11455239    | 21937418 | 85582729 | 47397339 | 7053278     | 17849271 | 40257586 |
| luteolin 4'-O-glucoside           | 11491083  | 47461722    | 13788586 | 20775926  | 303793   | 27154125    | 7844941  | 14524121 | 919922   | 21522889    | 8154416  | 10184366 |
| apigenin 4'-O-glucoside           | 6147740   | 20876207    | 7433186  | 28888658  | 26043    | 4670534     | 1875678  | 7895570  | 462271   | 4749051     | 3777039  | 8306573  |
| chrysoeriol 7-O-glucoside         | 96655169  | 28228623    | 43519612 | 50054052  | 26385958 | 19599150    | 19501153 | 29067782 | 24533244 | 11538071    | 14286405 | 17336479 |
| luteolin 7-O-malonyl-glucoside    | 3986065   | 2704174     | 1155109  | 2774314   | 21460159 | 16184076    | 15351275 | 23594187 | 3392072  | 3521973     | 3311371  | 4426826  |
| chrysoeriol 7-O-glucuronide       | 7644597   | 7054663     | 3114191  | 605672    | 6089880  | 9127316     | 6953389  | 1911339  | 3823016  | 4023987     | 4367617  | 650643   |
| M611T367                          | 15090486  | 1996924     | 885403   | 33614     | 3000173  | 1292440     | 440970   | 5659     | 2747601  | 1919402     | 917866   | 3455     |
| apigenin 7-O-malonyl-glucoside    | 7956895   | 2197511     | 2270347  | 7179392   | 16758808 | 4041887     | 5234701  | 17331279 | 4642517  | 709461      | 1649027  | 3537392  |
| chrysoeriol 7-O-malonyl-glucoside | 7904692   | 3306821     | 1366260  | 2933142   | 11633646 | 7294162     | 3198398  | 7037858  | 3128337  | 1478467     | 880449   | 1747710  |
| $\alpha$ -Amorphene               | 0.1449    | 0.0000      | 0.0798   | 0.1383    | 0.5811   | 0.0757      | 0.5493   | 0.9772   | 0.1792   | 0.0000      | 0.2418   | 0.3130   |
| $\alpha$ -Bisabolene              | 0.0247    | 0.2087      | 0.4525   | 0.3344    | 0.1434   | 0.5154      | 1.9025   | 4.3103   | 0.1550   | 0.1609      | 0.3574   | 0.3621   |
| $\alpha$ -Copaene                 | 0.0418    | 0.0000      | 0.0404   | 0.0796    | 0.1556   | 0.0000      | 0.1932   | 0.2923   | 0.0508   | 0.0000      | 0.0924   | 0.1390   |
| $\alpha$ -Humulene                | 1.0343    | 0.8873      | 0.7477   | 1.6235    | 1.5607   | 1.7729      | 1.5121   | 3.7509   | 0.7742   | 1.4543      | 1.1544   | 1.9764   |
| $\alpha$ -Pinene                  | 25.2219   | 32.8694     | 28.7285  | 32.6487   | 3.5545   | 21.2970     | 10.7548  | 15.4426  | 5.8779   | 11.7662     | 24.1373  | 17.5144  |
| $\alpha$ -Terpinolene             | 1.1435    | 0.5496      | 0.4630   | 1.0333    | 5.2006   | 3.0172      | 2.1446   | 5.8641   | 4.1175   | 2.8919      | 2.3535   | 2.2282   |
| Bornyl acetate                    | 0.2163    | 0.2400      | 0.0000   | 0.6762    | 0.1093   | 0.1349      | 0.0000   | 0.6842   | 0.0000   | 0.0000      | 0.0000   | 0.0539   |
| $\beta$ -Bisabolene               | 0.0426    | 0.0000      | 0.1059   | 0.2251    | 0.0000   | 0.0593      | 0.4767   | 1.9446   | 0.0000   | 0.0000      | 0.0000   | 0.0335   |
| $\beta$ -Cubebene                 | 0.1632    | 0.0000      | 0.0455   | 0.1452    | 0.0000   | 0.1744      | 0.0000   | 0.1515   | 0.2709   | 0.0000      | 0.3491   | 0.4496   |
| $\beta$ -Myrcene                  | 80.8245   | 52.5833     | 60.5321  | 33.1577   | 82.5291  | 45.6545     | 94.9378  | 43.9561  | 42.3006  | 56.5664     | 82.9736  | 17.2313  |
| $\beta$ -Phellandrene             | 3.3183    | 2.4005      | 2.5838   | 2.3385    | 3.2582   | 2.6881      | 3.4982   | 2.2738   | 1.6336   | 3.3209      | 3.6988   | 1.1155   |
| $\beta$ -Pinene                   | 2.7448    | 3.8537      | 2.4440   | 3.6243    | 1.5255   | 2.0601      | 1.5687   | 2.1990   | 2.3209   | 2.6271      | 2.4209   | 2.1659   |
| $\beta$ -Selinene                 | 1.7069    | 0.2093      | 1.2555   | 1.5113    | 0.2040   | 1.1207      | 0.7404   | 0.2605   | 2.3114   | 0.4081      | 1.2305   | 0.1224   |
| cis- $\alpha$ -Bergamotene        | 0.2249    | 0.0000      | 0.0000   | 0.0000    | 1.1146   | 0.0000      | 0.0000   | 0.0000   | 0.1539   | 0.0000      | 0.0000   | 0.0000   |
| Camphene                          | 1.3086    | 1.9287      | 1.5431   | 1.6939    | 0.1224   | 0.9523      | 0.4047   | 0.5497   | 0.2835   | 1.0234      | 1.0743   | 1.1018   |
| Caryophyllene                     | 3.1039    | 1.8942      | 2.6854   | 4.2850    | 5.9757   | 7.8815      | 6.4084   | 11.3222  | 2.5492   | 3.4495      | 4.5424   | 6.0688   |
| cis- $\beta$ -Farnesene           | 0.8675    | 0.0295      | 0.0000   | 0.0000    | 2.0790   | 0.1818      | 0.0000   | 0.0000   | 0.6772   | 0.0812      | 0.0000   | 0.0000   |
| cis-Rose oxide                    | 0.1027    | 0.0000      | 0.1026   | 0.1506    | 5.4699   | 0.1319      | 5.4398   | 5.6007   | 0.1400   | 0.1298      | 0.1424   | 0.1342   |
| $\delta$ -Cadinene                | 0.5516    | 0.0910      | 0.3596   | 0.4273    | 1.9575   | 0.3594      | 1.7612   | 3.0993   | 0.5827   | 0.1777      | 0.7122   | 0.9514   |
| cis- $\alpha$ -Farnesene          | 0.2007    | 0.0000      | 0.3554   | 0.6812    | 0.4819   | 0.2063      | 1.1670   | 2.9352   | 0.1554   | 0.1412      | 0.7184   | 1.1228   |
| cis- $\beta$ -Ocimene             | 2.4517    | 2.1913      | 1.3148   | 1.8637    | 14.6266  | 6.3186      | 14.1512  | 10.3272  | 2.3743   | 3.7688      | 4.0237   | 2.4038   |
| Germacrene D                      | 2.9952    | 0.7964      | 2.2008   | 2.6470    | 4.0308   | 2.2806      | 3.0893   | 6.8120   | 4.3831   | 1.0118      | 5.5708   | 7.3043   |
| $\gamma$ -Terpinene               | 3.2356    | 2.7119      | 1.9589   | 4.8952    | 5.0428   | 2.3076      | 1.5980   | 7.2908   | 2.6270   | 2.3459      | 1.2234   | 3.2675   |
| Limonene                          | 20.6659   | 8.1704      | 7.4895   | 6.6725    | 9.5324   | 6.5808      | 6.5547   | 5.9714   | 6.5311   | 5.3580      | 5.6317   | 2.7008   |
| Linalol                           | 0.0000    | 0.0000      | 0.2043   | 0.0000    | 0.3811   | 0.0331      | 0.2661   | 0.4645   | 0.0000   | 0.0000      | 0.1220   | 0.0000   |
| p-Cymene                          | 2.4035    | 2.3957      | 2.0775   | 2.3138    | 5.2682   | 5.3653      | 4.3989   | 6.2113   | 2.3261   | 3.3454      | 1.6523   | 2.6046   |
| Sabinene                          | 62.9637   | 79.9607     | 41.0824  | 124.3401  | 45.0915  | 30.8917     | 7.8744   | 53.1481  | 79.1255  | 38.1565     | 22.4251  | 73.9480  |
| trans- $\alpha$ -Bergamotene      | 0.6632    | 0.7576      | 0.0286   | 0.0142    | 1.4609   | 1.3603      | 0.0667   | 0.1373   | 0.5165   | 0.7788      | 1.7365   | 2.3241   |
| trans- $\beta$ -Farnesene         | 0.1536    | 0.0000      | 0.0000   | 0.0000    | 0.3689   | 0.0000      | 0.0000   | 0.0000   | 0.1163   | 0.0000      | 0.0000   | 0.0000   |
| trans- $\beta$ -Ocimene           | 1.0994    | 1.1263      | 0.2601   | 5.3855    | 5.5643   | 1.8717      | 2.2131   | 27.5904  | 0.7002   | 0.9400      | 0.4749   | 5.1390   |

**Supplementary Table S4** Mean of autoscaled data per year per genotype. Each year corresponds to one environment. These data were used for environment and genotype effect analyses, PCA, Heatmap, SNK test.

| Genotype                          | 2014-Boléro | 2015-Boléro | 2016-Boléro | 2014-I2   | 2015-I2   | 2016-I2   | 2014-K3   | 2015-K3   | 2016-K3   | 2014-H1     | 2015-H1     | 2016-H1     |
|-----------------------------------|-------------|-------------|-------------|-----------|-----------|-----------|-----------|-----------|-----------|-------------|-------------|-------------|
| Environment                       | Angers      | Blagon      | Ychoux      | Angers    | Blagon    | Ychoux    | Angers    | Blagon    | Ychoux    | Angers      | Blagon      | Ychoux      |
| Group                             | Boléro      | Boléro      | Boléro      | I2        | I2        | I2        | K3        | K3        | K3        | H1          | H1          | H1          |
| Label                             | Resistant   | Resistant   | Resistant   | Resistant | Resistant | Resistant | Resistant | Resistant | Resistant | Susceptible | Susceptible | Susceptible |
| chlorogenic_acid                  | 0.01        | -1.21       | -0.26       | -1.20     | -0.07     | -0.12     | 1.13      | 0.63      | 1.10      | 0.06        | 0.66        | -0.56       |
| feruloylquinic_acid               | -0.21       | -0.61       | -0.20       | -0.64     | -0.48     | -0.32     | 1.62      | 1.64      | 1.47      | -0.77       | -0.55       | -0.85       |
| luteolin 7-O-rutinoside           | 0.75        | 1.16        | 0.37        | 0.86      | 0.71      | 1.02      | -1.00     | -0.90     | -0.82     | -0.60       | -0.97       | -0.81       |
| luteolin 7-O-glucoside            | -0.64       | -0.63       | -0.40       | -0.34     | -0.46     | 0.64      | -0.63     | -0.44     | -1.08     | 1.61        | 1.52        | 1.10        |
| luteolin 7-O-glucuronide          | 0.51        | 0.43        | 0.32        | -0.62     | 0.28      | 0.58      | -1.12     | -1.60     | -1.56     | 1.24        | 0.90        | 0.85        |
| apigenin 7-O-rutinoside           | -0.26       | 0.29        | -0.43       | 1.12      | 0.83      | 0.92      | -0.26     | 0.16      | -0.10     | -0.60       | -1.28       | -0.78       |
| chrysoeriol 7-O-rutinoside        | 0.21        | 1.16        | 0.24        | 1.27      | 0.69      | 1.09      | -0.88     | -0.88     | -0.78     | -0.60       | -0.98       | -0.81       |
| apigenin 7-O-glucoside            | -1.20       | -1.07       | -1.20       | -0.56     | -0.71     | -0.44     | 0.73      | 1.48      | 0.69      | 1.04        | 0.30        | 1.09        |
| luteolin 4'-O-glucoside           | 1.53        | 1.43        | 1.35        | -0.61     | -0.45     | -0.25     | -0.17     | 0.20      | 0.00      | -0.76       | -1.18       | -1.11       |
| apigenin 4'-O-glucoside           | 0.44        | 0.35        | 0.14        | -0.74     | -0.58     | -0.10     | 1.15      | 1.42      | 1.27      | -0.85       | -1.19       | -1.23       |
| chrysoeriol 7-O-glucoside         | -0.95       | -0.85       | -0.99       | -0.40     | -0.87     | -0.18     | -0.16     | 1.15      | 0.08      | 1.51        | 0.58        | 1.40        |
| luteolin 7-O-malonyl-glucoside    | 0.04        | -0.66       | -0.14       | -1.32     | -0.84     | -0.04     | 0.10      | 0.99      | 0.74      | 1.17        | 0.51        | -0.26       |
| chrysoeriol 7-O-glucuronide       | 0.70        | 1.10        | 0.48        | -0.42     | 0.33      | 1.03      | -1.14     | -1.45     | -1.53     | 0.87        | 0.02        | 0.36        |
| M611T367                          | -0.41       | 0.09        | 0.46        | -0.59     | -0.64     | -0.23     | -0.73     | -1.02     | -1.24     | 1.72        | 1.57        | 1.20        |
| apigenin 7-O-malonyl-glucoside    | -0.91       | -1.04       | -1.10       | -0.88     | -0.86     | -0.36     | 0.76      | 1.00      | 0.52      | 1.02        | 0.91        | 1.15        |
| chrysoeriol 7-O-malonyl-glucoside | -0.22       | 0.00        | -0.36       | -0.95     | -1.35     | -0.90     | -0.36     | -0.08     | -0.07     | 1.52        | 1.43        | 1.43        |
| α-Amorphene                       | -1.35       | -1.27       | -1.37       | -0.16     | 0.01      | 0.44      | 0.71      | 1.17      | 0.97      | 0.81        | 0.1         | -0.03       |
| α-Bisabolene                      | -0.25       | -0.64       | -0.84       | 1.08      | 0.1       | 0.85      | 0.43      | 1.37      | 0.89      | -1.26       | -0.83       | -0.89       |
| α-Copaene                         | -1.24       | -1.32       | -1.19       | 0         | 0.27      | 0.37      | 1.2       | 1.09      | 1.16      | 0.04        | -0.04       | -0.33       |
| α-Humulene                        | -0.48       | -0.35       | 0.23        | -0.85     | -0.59     | -0.37     | 1.43      | 1.49      | 1.25      | -0.1        | -0.55       | -1.11       |
| α-Pinene                          | 0.83        | 1.14        | -0.39       | -0.31     | -0.27     | 1.19      | 0.77      | 0.36      | 0.34      | -1.28       | -1.23       | -1.14       |
| α-Terpinolene                     | -0.73       | -0.59       | -0.01       | -0.98     | -1.09     | -0.63     | 0.69      | 1.03      | -0.78     | 1.02        | 0.65        | 1.41        |
| Bornyl acetate                    | -0.15       | -0.32       | -0.5        | -1        | -0.76     | -0.5      | 1.39      | 1.47      | 1.5       | -0.24       | -0.4        | -0.5        |
| β-Bisabolene                      | -0.95       | -0.62       | -0.5        | 0.13      | -0.16     | -0.5      | 1.34      | 1.46      | 1.5       | -0.52       | -0.68       | -0.5        |
| β-Cubebene                        | -1.13       | 0.98        | -1.39       | -0.55     | -0.86     | 0.42      | 0.72      | 0.74      | 0.95      | 0.95        | -0.86       | 0.02        |
| β-Myrcene                         | -0.21       | -0.82       | 0.25        | 0.19      | 1.09      | 1.21      | -1.2      | -0.88     | -1.18     | 1.22        | 0.61        | -0.27       |
| β-Phellandrene                    | -0.58       | -0.44       | 0.7         | -0.17     | 1.03      | 1         | -0.71     | -1.18     | -1.05     | 1.46        | 0.59        | -0.64       |
| β-Pinene                          | 1.01        | 0.65        | 1.26        | -1.06     | -0.79     | 0.19      | 0.67      | 1.06      | -1.13     | -0.62       | -0.92       | -0.32       |
| β-Selinene                        | -1.44       | 1.25        | -0.62       | 0.13      | 0.37      | 0.22      | 0.51      | -0.74     | -0.91     | 0.8         | -0.87       | 1.32        |
| cis-α-Bergamotene                 | -0.5        | -0.5        | -0.5        | -0.5      | -0.5      | -0.5      | -0.5      | -0.5      | -0.5      | 1.5         | 1.5         | 1.5         |
| Camphene                          | 1.19        | 1.29        | 0.39        | -0.29     | -0.3      | 0.52      | 0.29      | 0.12      | 0.59      | -1.19       | -1.11       | -1.49       |
| Caryophyllene                     | -1.1        | -0.01       | -0.46       | -0.31     | -0.61     | 0.26      | 1.3       | 1.41      | 1.26      | 0.11        | -0.79       | -1.06       |
| cis-β-Farnesene                   | -0.45       | -0.38       | -0.33       | -0.52     | -0.56     | -0.58     | -0.52     | -0.56     | -0.58     | 1.5         | 1.49        | 1.49        |
| cis-Rose oxide                    | -1.4        | -1.5        | -1.19       | 0.22      | 0.48      | 1.02      | 0.97      | 0.54      | -0.43     | 0.22        | 0.49        | 0.6         |
| δ-Cadinene                        | -1.37       | -1.28       | -1.32       | 0.01      | -0.03     | 0.33      | 0.36      | 1.16      | 1.07      | 1           | 0.15        | -0.07       |
| cis-α-Farnesene                   | -0.84       | -0.59       | -0.67       | -0.40     | 0.60      | 0.05      | 0.00      | 2.80      | 0.55      | -0.60       | -0.25       | -0.65       |
| cis-β-Ocimene                     | -0.68       | 0.17        | -0.35       | -0.86     | 1.79      | -0.30     | -0.75     | 1.00      | -0.64     | -0.63       | 1.89        | -0.64       |
| Germacrene D                      | -1.41       | -0.9        | -1.34       | 0.04      | -0.49     | 0.38      | 0.5       | 1.4       | 1.03      | 0.87        | -0.01       | -0.07       |
| γ-Terpinene                       | -0.39       | -0.67       | -0.02       | -1        | -0.94     | -1.34     | 1.36      | 1.23      | 1.06      | 0.03        | 0.38        | 0.31        |
| Limonene                          | -0.39       | -0.36       | 0.18        | -0.49     | -0.38     | 0.35      | -0.61     | -0.74     | -1.43     | 1.49        | 1.48        | 0.9         |
| Linalol                           | -0.5        | -1.35       | -0.5        | 1.5       | -0.11     | 1.5       | -0.5      | 0.95      | -0.5      | -0.5        | 0.51        | -0.5        |
| p-Cymene                          | 0.64        | 0.07        | 1.23        | -1.45     | -1.23     | -1.18     | 0.11      | 1.22      | 0.17      | 0.7         | -0.06       | -0.22       |
| Sabinene                          | 0.08        | -0.17       | -0.55       | -1.02     | -1.33     | -1.13     | 1.34      | 0.95      | 0.75      | -0.4        | 0.55        | 0.93        |
| trans-α-Bergamotene               | 0.98        | 0.8         | -0.67       | -0.84     | -0.91     | 0.47      | -0.88     | -0.82     | 1.17      | 0.74        | 0.93        | -0.98       |
| trans-β-Farnesene                 | -0.5        | -0.5        | -0.5        | -0.5      | -0.5      | -0.5      | -0.5      | -0.5      | -0.5      | 1.5         | 1.5         | 1.5         |
| trans-β-Ocimene                   | -0.36       | -0.6        | -0.39       | -0.74     | -0.58     | -0.6      | 1.48      | 1.49      | 1.49      | -0.38       | -0.3        | -0.5        |

**Supplementary Table S5** List of 52 major ions, which best differentiated the four carrot genotypes from each other. Ions were selected with analysis of variance following analysis of all samples collected for the 4 genotypes over 3 years. Ions are numbered according to their retention time. For all ions, the number, identifier,  $m/z$ , and retention time (RT) are indicated. For tentatively identified ions, molecular formula and putative identifications are indicated. Identifications confirmed by using the corresponding standards are indicated in bold.

| N°        | Identifier      | $m/z$             | RT (s)        | (putative) formula                                | (putative) identification             |
|-----------|-----------------|-------------------|---------------|---------------------------------------------------|---------------------------------------|
| 1         | M127T111        | 127.039106        | 111.42        |                                                   |                                       |
| 2         | M433T112        | 433.134043        | 111.87        |                                                   |                                       |
| 3         | M325T112        | 325.091809        | 112.01        |                                                   |                                       |
| 4         | M344T124        | 344.134012        | 123.51        |                                                   |                                       |
| <b>5</b>  | <b>M355T122</b> | <b>355.102303</b> | <b>122.48</b> | <b>C<sub>16</sub>H<sub>19</sub>O<sub>9</sub></b>  | <b>3-caffeoylquinic acid</b>          |
| 6         | M374T131        | 374.144518        | 131.38        |                                                   |                                       |
| 7         | M345T180        | 345.154384        | 180.24        |                                                   |                                       |
| 8         | M363T180        | 363.164886        | 180.22        |                                                   |                                       |
| 9         | M177T194        | 177.054661        | 193.54        | C <sub>10</sub> H <sub>9</sub> O <sub>5</sub>     | feruloyl fragment                     |
| 10        | M369T195        | 369.118032        | 194.58        | C <sub>17</sub> H <sub>21</sub> O <sub>9</sub>    | feruloylquinic acid                   |
| <b>11</b> | <b>M595T208</b> | <b>595.165712</b> | <b>207.61</b> | <b>C<sub>27</sub>H<sub>31</sub>O<sub>15</sub></b> | <b>luteolin 7-O-rutinoside</b>        |
| 12        | M596T208        | 596.169161        | 207.66        | isotope of M595T208                               |                                       |
| 13        | M179T217        | 179.070315        | 217.32        |                                                   |                                       |
| 14        | M197T217        | 197.080964        | 217.32        |                                                   |                                       |
| <b>15</b> | <b>M897T240</b> | <b>897.208276</b> | <b>239.92</b> | <b>C<sub>42</sub>H<sub>41</sub>O<sub>22</sub></b> | <b>luteolin 7-O-glucoside (dimer)</b> |
| 16        | M898T240        | 898.211615        | 239.92        | isotope of M897T240                               |                                       |
| 17        | M374T248        | 374.144528        | 247.59        |                                                   |                                       |
| 18        | M397T255        | 397.149323        | 254.88        |                                                   |                                       |
| 19        | M432T255        | 432.186418        | 254.93        |                                                   |                                       |
| 20        | M163T257        | 163.03899         | 256.62        |                                                   |                                       |
| 21        | M579T266        | 579.170835        | 266.45        | C <sub>27</sub> H <sub>31</sub> O <sub>14</sub>   | apigenin 7-O-rutinoside               |
| 22        | M580T266        | 580.174271        | 266.45        | isotope of M579T213                               |                                       |
| 23        | M287T268        | 287.054738        | 268.11        | C <sub>15</sub> H <sub>11</sub> O <sub>6</sub>    | luteolin fragment                     |
| 24        | M465T269        | 465.09309         | 268.61        | isotope of M463T272                               |                                       |
| <b>25</b> | <b>M463T272</b> | <b>463.087006</b> | <b>271.66</b> | <b>C<sub>21</sub>H<sub>19</sub>O<sub>12</sub></b> | <b>luteolin 7-O-glucuronide</b>       |
| 26        | M464T272        | 464.090517        | 271.64        | isotope of M463T272                               |                                       |
| 27        | M609T278        | 609.18138         | 277.68        | C <sub>28</sub> H <sub>33</sub> O <sub>15</sub>   | chrysoeriol 7-O-rutinoside            |
| 28        | M610T278        | 610.184774        | 277.89        | isotope of M609T278                               |                                       |
| 29        | M207T291        | 207.101658        | 290.83        |                                                   |                                       |
| 30        | M245T291        | 245.080875        | 290.83        |                                                   |                                       |
| 31        | M271T307        | 271.059908        | 307.35        | C <sub>15</sub> H <sub>11</sub> O <sub>5</sub>    | apigenin fragment                     |
| 32        | M435T307        | 435.118481        | 307.34        | isotope of M433T308                               |                                       |
| 33        | M865T307        | 865.218214        | 307.35        | dimere of M433T308                                |                                       |
| 34        | M434T308        | 434.116245        | 307.72        | isotope of M433T308                               |                                       |
| <b>35</b> | <b>M433T308</b> | <b>433.112837</b> | <b>307.89</b> | <b>C<sub>21</sub>H<sub>21</sub>O<sub>10</sub></b> | <b>apigenin 7-O-glucoside</b>         |
| <b>36</b> | <b>M449T312</b> | <b>449.107749</b> | <b>312.48</b> | <b>C<sub>21</sub>H<sub>21</sub>O<sub>11</sub></b> | <b>luteolin 4'-O-glucoside</b>        |
| 37        | M450T312        | 450.111134        | 312.24        | isotope of M449T312                               |                                       |
| 38        | M287T312        | 287.05471         | 312.33        | C <sub>15</sub> H <sub>11</sub> O <sub>6</sub>    | luteolin fragment                     |
| 39        | M433T320        | 433.112837        | 320.58        | C <sub>21</sub> H <sub>21</sub> O <sub>10</sub>   | apigenin 4'-O-glucoside               |
| 40        | M464T321        | 464.126831        | 321.06        | isotope of M463T321                               |                                       |
| 41        | M301T321        | 301.070491        | 321.07        | C <sub>16</sub> H <sub>13</sub> O <sub>6</sub>    | chrysoeriol fragment                  |
| 42        | M463T322        | 463.12342         | 321.55        | C <sub>22</sub> H <sub>33</sub> O <sub>11</sub>   | chrysoeriol 7-O-glucoside             |
| 43        | M775T328        | 775.186707        | 328.27        |                                                   |                                       |
| 44        | M477T353        | 477.102838        | 353.41        | C <sub>22</sub> H <sub>21</sub> O <sub>12</sub>   | chrysoeriol 7-O-glucuronide           |
| 45        | M611T367        | 611.139491        | 366.67        |                                                   |                                       |
| 46        | M520T386        | 520.116803        | 385.74        | isotope of M519T386                               |                                       |
| 47        | M519T387        | 519.113411        | 386.50        | C <sub>24</sub> H <sub>23</sub> O <sub>13</sub>   | apigenin 7-O-malonyl-glucoside        |
| 48        | M535T389        | 535.108312        | 388.84        | C <sub>24</sub> H <sub>23</sub> O <sub>14</sub>   | luteolin 7-O-malonyl-glucoside        |
| 49        | M459T390        | 459.222514        | 390.18        |                                                   |                                       |
| 50        | M549T391        | 549.123954        | 390.84        | C <sub>25</sub> H <sub>25</sub> O <sub>14</sub>   | chrysoeriol 7-O-malonyl-glucoside     |
| 51        | M595T400        | 595.144652        | 399.69        |                                                   |                                       |
| 52        | M430T411        | 430.170813        | 410.64        |                                                   |                                       |

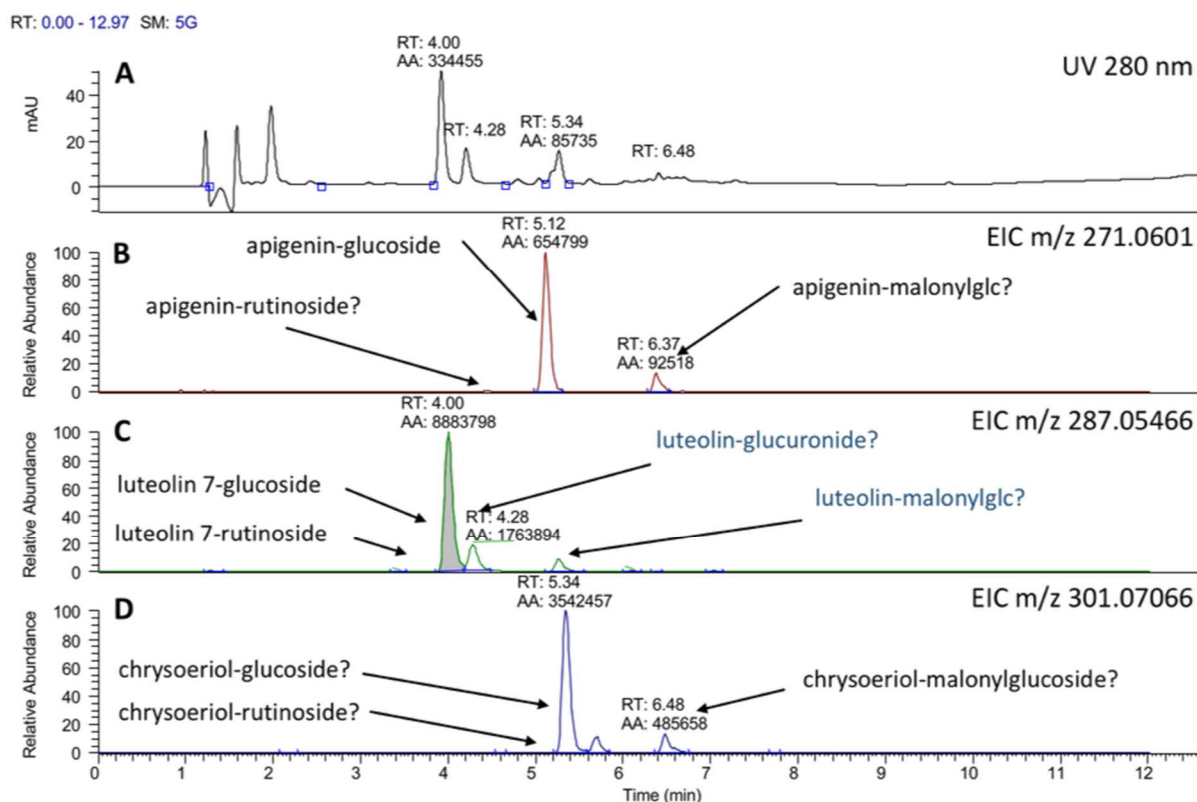

**Supplementary Figure S2** UHPLC-MS analysis of major flavones in carrot leaf extract. **A:** Chromatogram with UV detection (280 nm). **B:** EIC for  $m/z$  271.0601 ( $\pm 2$  ppm), the characteristic ion of apigenin derivatives. **C:** EIC for  $m/z$  287.0546 ( $\pm 2$  ppm), the characteristic ion of luteolin derivatives. **D:** EIC for  $m/z$  301.0706 ( $\pm 2$  ppm), the characteristic ion of chrysoeriol derivatives.

**Supplementary Table S6** Identification of metabolites from carrot leaf extracts by comparison with the corresponding commercial standards. Leaf extracts and standards were compared using the same analytical conditions;  $m/z$  of the main ions in mass spectra and retention times are indicated.

| Full name                | Standard |                       | carrot extract |                       |
|--------------------------|----------|-----------------------|----------------|-----------------------|
|                          | RT (sec) | $m/z$ of major ions   | RT (sec)       | $m/z$ of major ions   |
| chlorogenic acid         | 122      | 355.10234             | 122            | 355.1023              |
| luteolin 7-O-rutinoside  | 208      | 595.16574 ; 287.05479 | 209            | 595.16571 ; 287.05474 |
| luteolin 7-O-glucoside   | 240      | 449.10781 ; 287.05478 | 240            | 449.10775 ; 287.05474 |
| luteolin 7-O-glucuronide | 272      | 463.08705 ; 287.05475 | 272            | 463.08701 ; 287.05473 |
| apigenin 7-O-glucoside   | 308      | 433.11285 ; 271.0599  | 308            | 433.11281 ; 271.05991 |
| luteolin 4'-O-glucoside  | 312      | 449.10779 ; 287.05475 | 310            | 449.10775 ; 287.05471 |

### Characterization of luteolin derivatives

In both the carrot leaves extracts and the luteolin 7-O-glucoside commercial standard, in source fragmentation produced a characteristic ion with  $m/z$  287.0547 ( $C_{15}H_{11}O_6$ ) corresponding to the flavone backbone (Supplementary Table S6). Extracted ion chromatogram (EIC) for  $m/z$  287.0547 showed that some metabolites gave rise to this



particular ion in carrot leaves extracts (Supplementary Fig. S2C), indicating that these molecules may contain luteolin. For example, the ion M595T208 (n°11) with  $m/z$  595.1657, corresponding to the formula  $C_{27}H_{31}O_{15}$  (average mass error, AME 0.8 ppm), was putatively identified as luteolin-7-*O*-rutinoside. Indeed, its mass spectrum showed a fragment ion with  $m/z$  287.0547 corresponding to luteolin structure. The mass difference between  $m/z$  595.1657 and  $m/z$  287.0547 corresponded to the loss of a neutral fragment with  $m/z$  308.1111, consistent with a rutinose unit ( $C_{12}H_{20}O_9$ ) (Supplementary Table S7). The same reasoning was applied to the ion M463T272 (n°25). The mass difference between the flavonoid fragment with  $m/z$  287.0547 and the pseudo-molecular ion with  $m/z$  463.0872 corresponded to the loss of a neutral fragment with  $m/z$  176.0325 consistent with a glucuronide unit ( $C_6H_8O_6$ ) (Supplementary Table S7). M463T272 was therefore putatively identified as luteolin 7-*O*-glucuronide. The same reasoning was applied to the ions M449T242, M449T310 and M535T389 (n°48), which were putatively identified as luteolin glucosides for the two first and as luteolin malonyl-glucoside for the third. Commercial standards of luteolin 7-*O*-glucoside, luteolin 4'-*O*-glucoside, luteolin 7-*O*-rutinoside, and luteolin 7-*O*-glucuronide were therefore analyzed by UHPLC-HRMS using the same conditions as those used for carrot leaves extracts. The retention times (RTs) and fragment patterns of the standards (Supplementary Table S6) were identical to those of M897T242 (n°15), M449T312 (n°36), M463T272 (n°25) and M595T208 (n°11) confirming their identities as luteolin 7-*O*-glucoside and luteolin 4'-*O*-glucoside, luteolin 7-*O*-rutinoside, and luteolin 7-*O*-glucuronide respectively.

### Characterization of apigenin derivatives

EIC for  $m/z$  271.0599 showed that several metabolites gave rise to this ion in carrot leaves extracts (Supplementary Fig. S2B), indicating that these molecules may be apigenin glycosides. This is the case for ions M433T308 (n°35) and M433T320 (n°39), with  $m/z$  433.1128 corresponding to apigenin-glucosides. Their mass spectrum showed a fragment with  $m/z$  271.0599 corresponding to the apigenin structure. The mass of the associated neutral fragment 162.0529 corresponded to a hexose unit to ( $C_6H_{10}O_5$ ). The identification of M433T308 as apigenin 7-*O*-glucoside was confirmed by using the corresponding commercial standard. Based on the presence of luteolin 4'-*O*-glucoside in carrot leaf extracts, M433T320 was tentatively identified as apigenin 4'-*O*-glucoside.

The M579T268 (n°21) and M519T387 (n°47) ions also gave rise to the ion with  $m/z$  271.0599 characteristic of apigenin derivatives (Supplementary Fig. S1B). Following the same reasoning they were tentatively identified as apigenin 7-*O*-rutinoside (M579T268) and apigenin 7-*O*-malonyl-glucoside (M519T387) (Supplementary Table S7).

### Characterization of methyl-luteolin derivatives

EIC for  $m/z$  301.0705 showed that several metabolites gave rise to this ion in carrot leaves extracts (Supplementary Fig. S2B), indicating that these molecules may be derivatives of chrysoeriol. Indeed, the mass spectra of ions M609T278, M463T322, M549T391 and M477T353 all showed the characteristic chrysoeriol ion with  $m/z$  301.0705.

For each of these compounds, the mass difference between the flavonoid fragment with  $m/z$  301.0705 and the pseudo-molecular ion allowed the identification of neutral fragments corresponding to different hexoses. For example, the neutral fragments with  $m/z$  162.0529 ( $C_6H_{10}O_5$ ) associated the ion M463T322 was consistent with its identification as chrysoeriol 7-

*O*-glucoside (3'-methyl-luteolin 7-*O*-glucoside), which has been previously reported to occur in carrot leaves (Teuber and Herrmann, 1977).

Similarly, for ions M609T278, M549T391 and M477T353, neutral fragments were tentatively identified as derived from rutinose, malonyl-glucoside and glucuronide, respectively (Supplementary Table S7). These chrysoeriol derivatives have not been described in carrot leaves before, but their structures are consistent with those of the luteolin and apigenin derivatives identified above.

**Supplementary Table S7** Analysis of mass spectra for the identification of flavones in carrot leave extracts

| identifier | m/z       | formula                                         | m/z flavonoid fragment | formula of flavonoid fragment                  | flavonoid unit | mass of neutral fragment | formula                                        | sugar unit      |
|------------|-----------|-------------------------------------------------|------------------------|------------------------------------------------|----------------|--------------------------|------------------------------------------------|-----------------|
| M595T208   | 595.1657  | C <sub>27</sub> H <sub>31</sub> O <sub>15</sub> | 287.0547               | C <sub>15</sub> H <sub>11</sub> O <sub>6</sub> | luteolin       | 308.1107                 | C <sub>12</sub> H <sub>20</sub> O <sub>9</sub> | rutinose        |
| M449T240   | 449.1077  | C <sub>21</sub> H <sub>21</sub> O <sub>11</sub> | 287.0547               | C <sub>15</sub> H <sub>11</sub> O <sub>6</sub> | luteolin       | 162.0529                 | C <sub>6</sub> H <sub>10</sub> O <sub>5</sub>  | glucose         |
| M463T272   | 463.0872  | C <sub>21</sub> H <sub>19</sub> O <sub>12</sub> | 287.0547               | C <sub>15</sub> H <sub>11</sub> O <sub>6</sub> | luteolin       | 176.0325                 | C <sub>6</sub> H <sub>8</sub> O <sub>6</sub>   | glucuronide     |
| M579T266   | 579.17078 | C <sub>27</sub> H <sub>31</sub> O <sub>14</sub> | 271.0599               | C <sub>15</sub> H <sub>11</sub> O <sub>5</sub> | apigenin       | 308.1107                 | C <sub>12</sub> H <sub>20</sub> O <sub>9</sub> | rutinose        |
| M609T278   | 609.18119 | C <sub>28</sub> H <sub>33</sub> O <sub>15</sub> | 301.0705               | C <sub>16</sub> H <sub>13</sub> O <sub>6</sub> | chrysoeriol    | 308.1107                 | C <sub>12</sub> H <sub>20</sub> O <sub>9</sub> | rutinose        |
| M433T308   | 433.11274 | C <sub>21</sub> H <sub>21</sub> O <sub>10</sub> | 271.0599               | C <sub>15</sub> H <sub>11</sub> O <sub>5</sub> | apigenin       | 162.0529                 | C <sub>6</sub> H <sub>10</sub> O <sub>5</sub>  | glucose         |
| M449T312   | 449.1077  | C <sub>21</sub> H <sub>21</sub> O <sub>11</sub> | 287.0547               | C <sub>15</sub> H <sub>11</sub> O <sub>6</sub> | luteolin       | 162.0529                 | C <sub>6</sub> H <sub>10</sub> O <sub>5</sub>  | glucose         |
| M463T322   | 463.1233  | C <sub>22</sub> H <sub>23</sub> O <sub>11</sub> | 301.0705               | C <sub>16</sub> H <sub>13</sub> O <sub>6</sub> | chrysoeriol    | 162.0529                 | C <sub>6</sub> H <sub>10</sub> O <sub>5</sub>  | glucose         |
| M535T389   | 535.1081  | C <sub>24</sub> H <sub>23</sub> O <sub>14</sub> | 287.0547               | C <sub>15</sub> H <sub>11</sub> O <sub>6</sub> | luteolin       | 248.0532                 | C <sub>9</sub> H <sub>12</sub> O <sub>8</sub>  | malonyl-glucose |
| M519T387   | 519.11332 | C <sub>24</sub> H <sub>23</sub> O <sub>13</sub> | 271.0599               | C <sub>15</sub> H <sub>11</sub> O <sub>5</sub> | apigenin       | 248.0532                 | C <sub>9</sub> H <sub>12</sub> O <sub>8</sub>  | malonyl-glucose |
| M549T391   | 549.12377 | C <sub>25</sub> H <sub>25</sub> O <sub>14</sub> | 301.0705               | C <sub>16</sub> H <sub>13</sub> O <sub>6</sub> | chrysoeriol    | 248.0532                 | C <sub>9</sub> H <sub>12</sub> O <sub>8</sub>  | malonyl-glucose |
| M477T353   | 477.1028  | C <sub>22</sub> H <sub>21</sub> O <sub>12</sub> | 301.0705               | C <sub>16</sub> H <sub>13</sub> O <sub>6</sub> | chrysoeriol    | 176.0325                 | C <sub>6</sub> H <sub>8</sub> O <sub>6</sub>   | glucuronide     |
| M433T320   | 433.1127  | C <sub>21</sub> H <sub>21</sub> O <sub>10</sub> | 271.0599               | C <sub>15</sub> H <sub>11</sub> O <sub>5</sub> | apigenin       | 162.0529                 | C <sub>6</sub> H <sub>10</sub> O <sub>5</sub>  | glucose         |
